# Supplementary material for: Automated In Situ Seed Variety Identification via Deep Learning: A Case Study in Chickpea
Source: MDPI journal article supplement (doi:10.3390/plants10071406), 2021-07-09
Supplement: s1 [file s1]

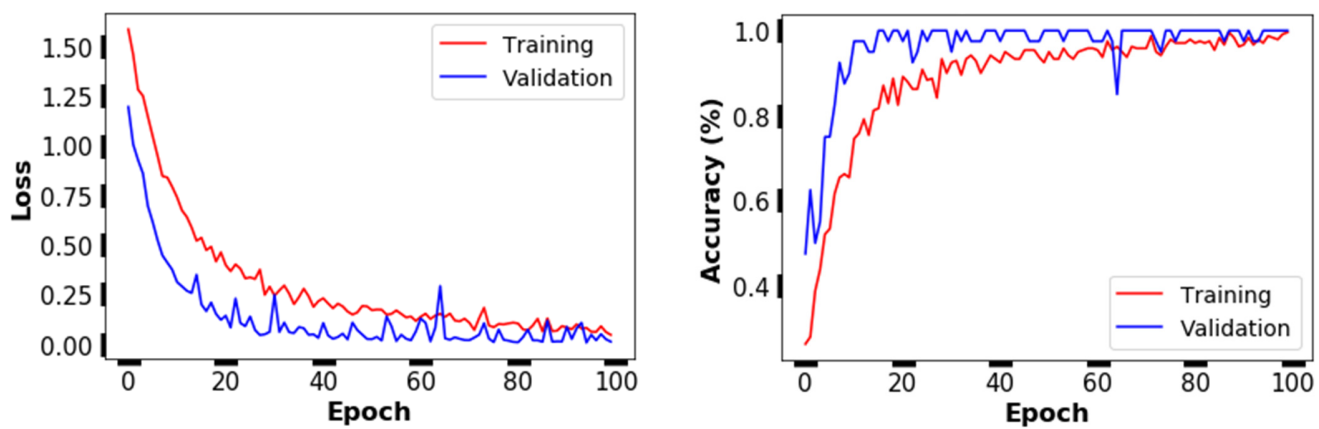

**Supplementary figure S1:** Progression of mean accuracy and loss score through the period of 100 epochs across all experiments.
